# Supplementary material for: Diversity and Parasitic Load of Freshwater Fish of the Shipstern Peninsula, Sarteneja, Corozal District, Belize, Central America from Recent Collections and Historical Archives
Source: Preprints.org preprint supplement (doi:10.20944/preprints202212.0133.v1), 2022-12-07
Supplement: Supplementary file 1 [file supplementary]

**Table S1.** Water chemistry data and sampling site notes for fish collected in Belize, February 20151.

| **Site ID and date** | **Location**  **(Latitude,**  **Longitude)** | **pH** | **Temperature**  **(°C)** | **Salinity**  **(ppt)** | **Site Description** |
| --- | --- | --- | --- | --- | --- |
| CB1  2/22/2015 | 18.3164 N,  88.1825 W | 7.71 | 25.5 | 0.0 | Water hole near Shipstern Reserve headquarters |
| CB2  2/22/2015 | 18.2221 N,  88.2224 W | 8.30 | 27.9 | 12 | Shallow canal to  Shipstern Laguna |
| CB3  2/22/2015 | 18.2211 N,  88.2175 W | 8.66 | 28.6 | 7 | Opening of the canal to  Shipstern Laguna |
| BH1  2/24/2015 | 17.1572 N,  88.6836 W | -- | -- | -- | Inland Blue Hole,  collapsed cenote along  Hummingbird Highway |
| MU1  2/27/2015 | 18.3894 N,  88.3856 W | -- | -- | -- | Municipal wharf Corozal Bay very disturbed urban |
| OB1  2/27/2015 | 18.3280 N  88.3262 W | -- | -- | -- | manmade canal connected to sea, adjacent to Orchid Bay residential area |
| 1”—” means the variable was not measured. | | | | | |
